# Supplementary material
Source: PubMed Central journal article supplement (PMC7241255)
Supplement: NIHMS1549530-supplement-Supplemental_Material.pdf [file NIHMS1549530-supplement-Supplemental_Material.pdf]

## Supplementary materials.

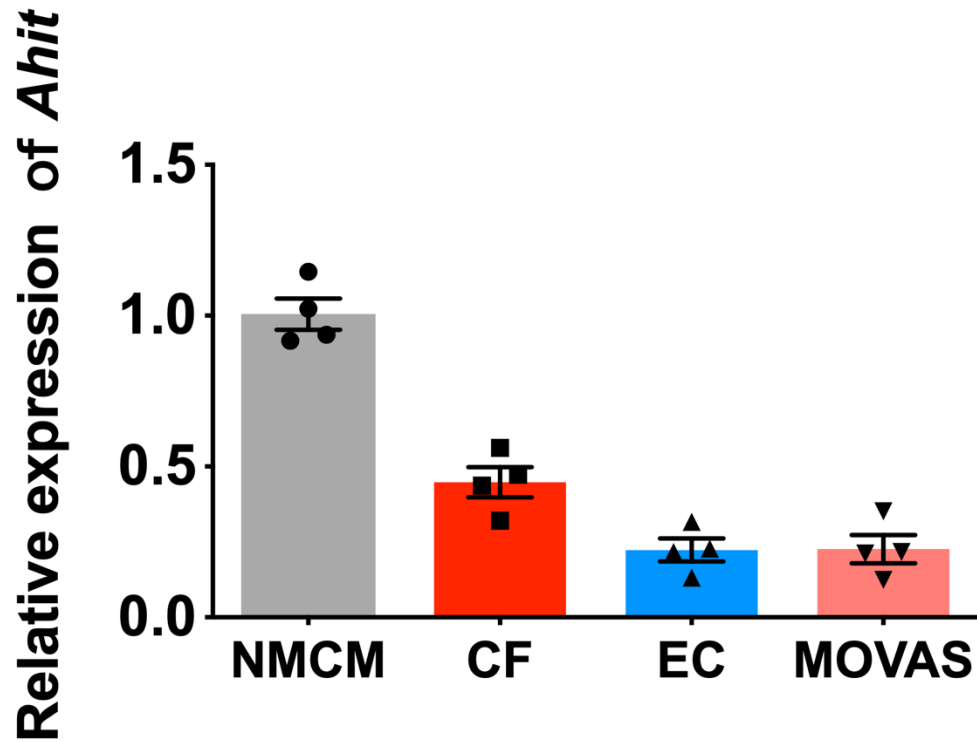

**Supplementary Figure 1. The *Ahit* expressions in cardiomyocytes and other cell types.** NMCM: Neonatal Mouse Cardiomyocytes; CF: Cardiac fibroblasts; EC: Endothelial cells; MOVAS: Mouse aortic vascular smooth muscle cells ( $n=3$ , normalized with GAPDH). Data are shown as mean $\pm$ SEM.

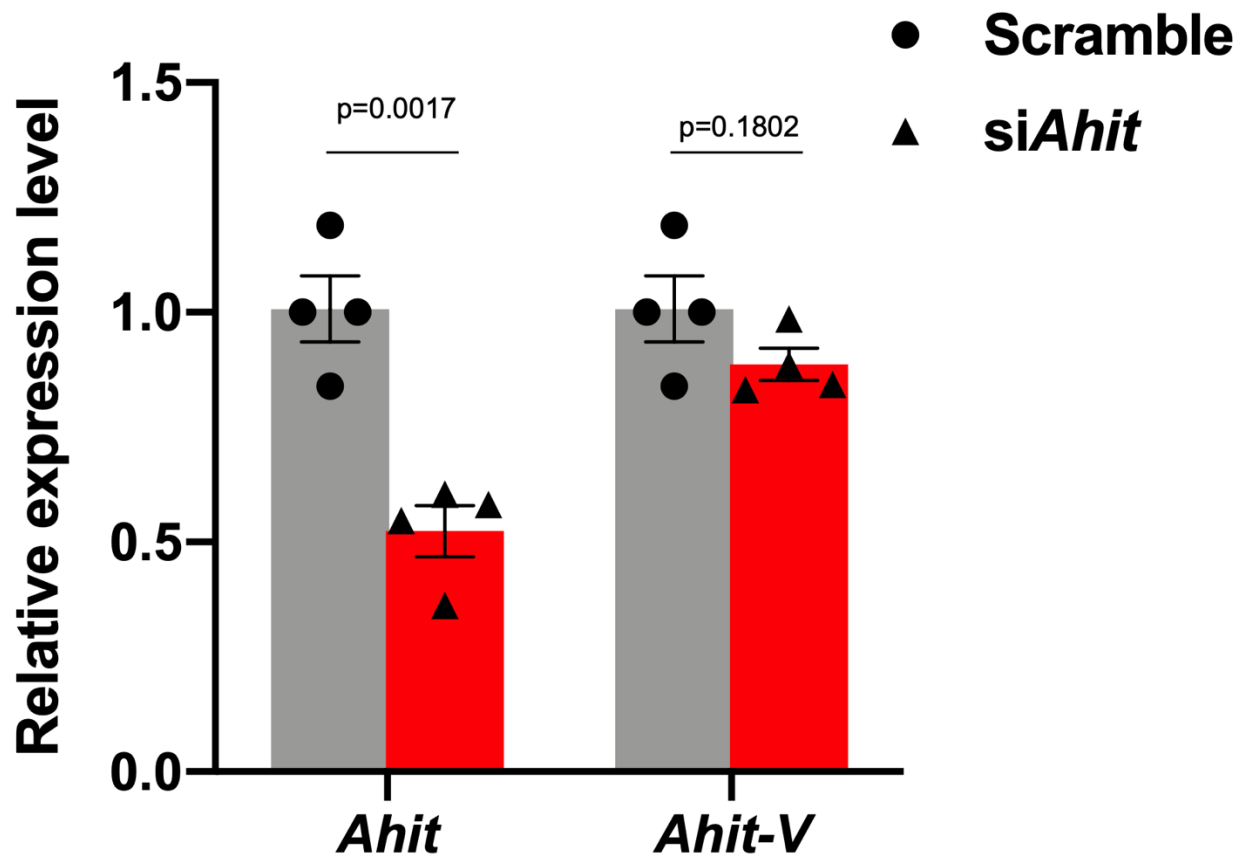

**Supplementary Figure 2.** The expression of *Ahit* and *Ahit-V* in NRCMs with *Ahit* knockdown. NRCMs were transfected with siRNA targeting *Ahit* (si*Ahit*) or scramble for 24 h, and analyzed by qRT-PCR ( $n=3$ , Student's t-test). Data are shown as mean $\pm$ SEM.

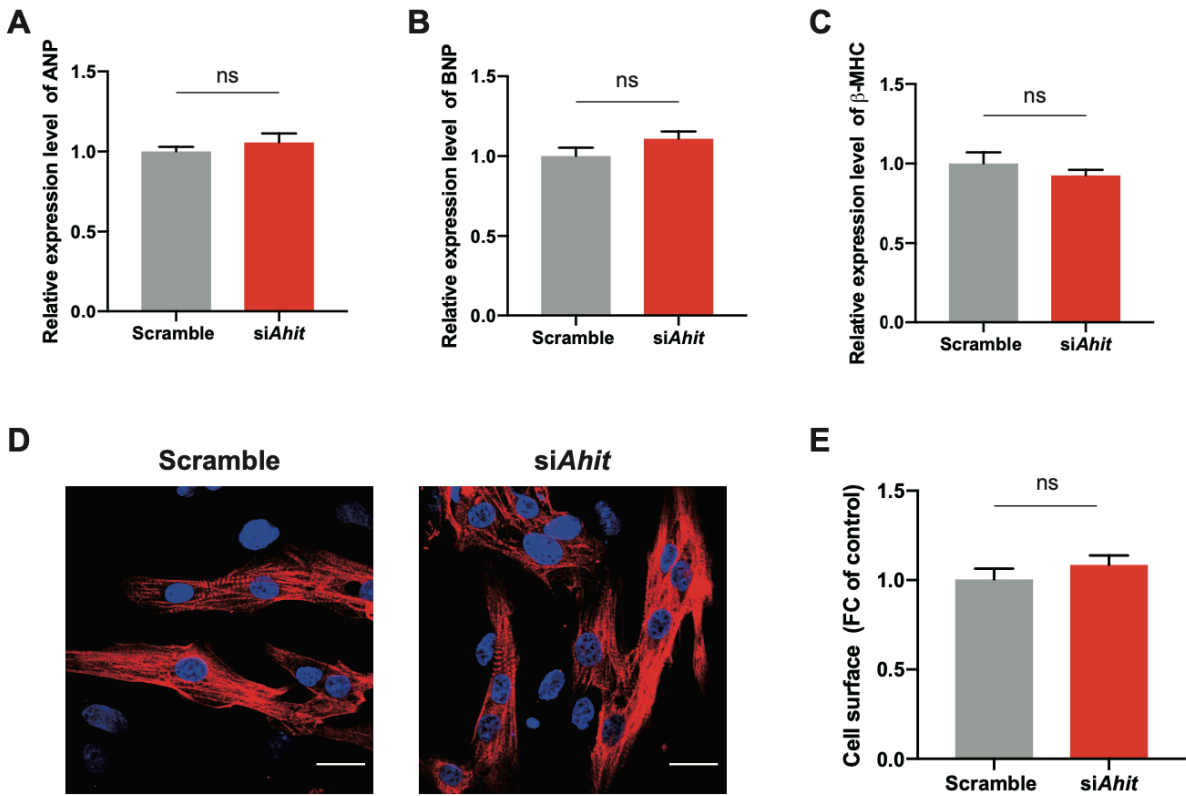

**Supplementary Figure 3. The effect of siAhit on cellular and molecular phenotype of NRCMs without hypertrophic stimulation. A-C.** The mRNA expressions of hypertrophy marker genes ANP (**A**), BNP (**B**), and  $\beta$ -MHC (**C**) after *Ahit* knockdown ( $n=3$ /group). **D.** Cellular phenotype and fold-change of the cell surface area after *Ahit* knockdown. (4 slides/group with 10 fields/slide) Data are shown as mean $\pm$ SEM.

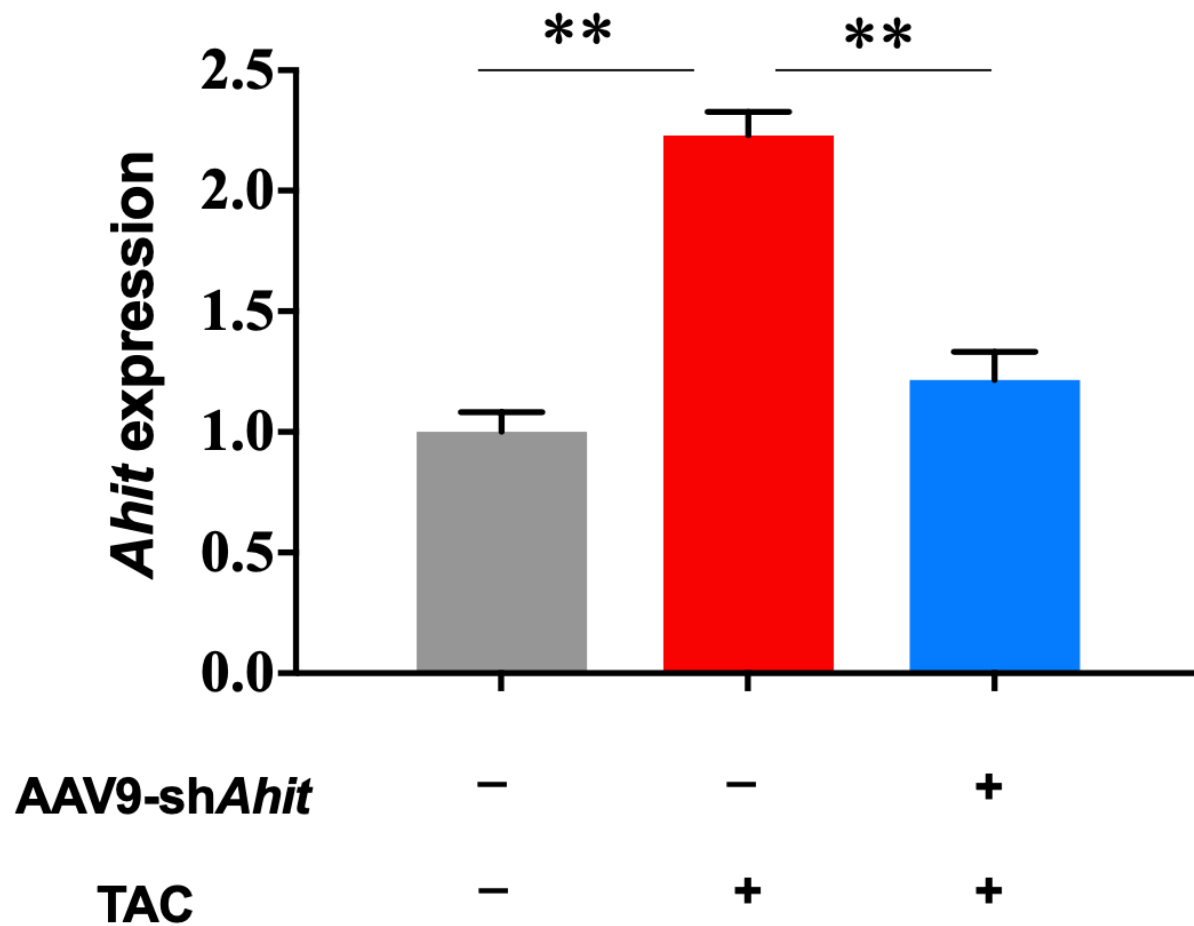

**Supplementary Figure 4.** The *Ahit* expression in AAV-sh*Ahit* and AAV-empty mouse heart after TAC. The result was detected with qRT-PCR in sham, TAC with AAV9-empty, and TAC with AAV9-sh*Ahit* ( $n=3$ ,  $**P < 0.01$  versus the sham group, one-way ANOVA, Holm-Sidak test). Data are shown as mean±SEM.

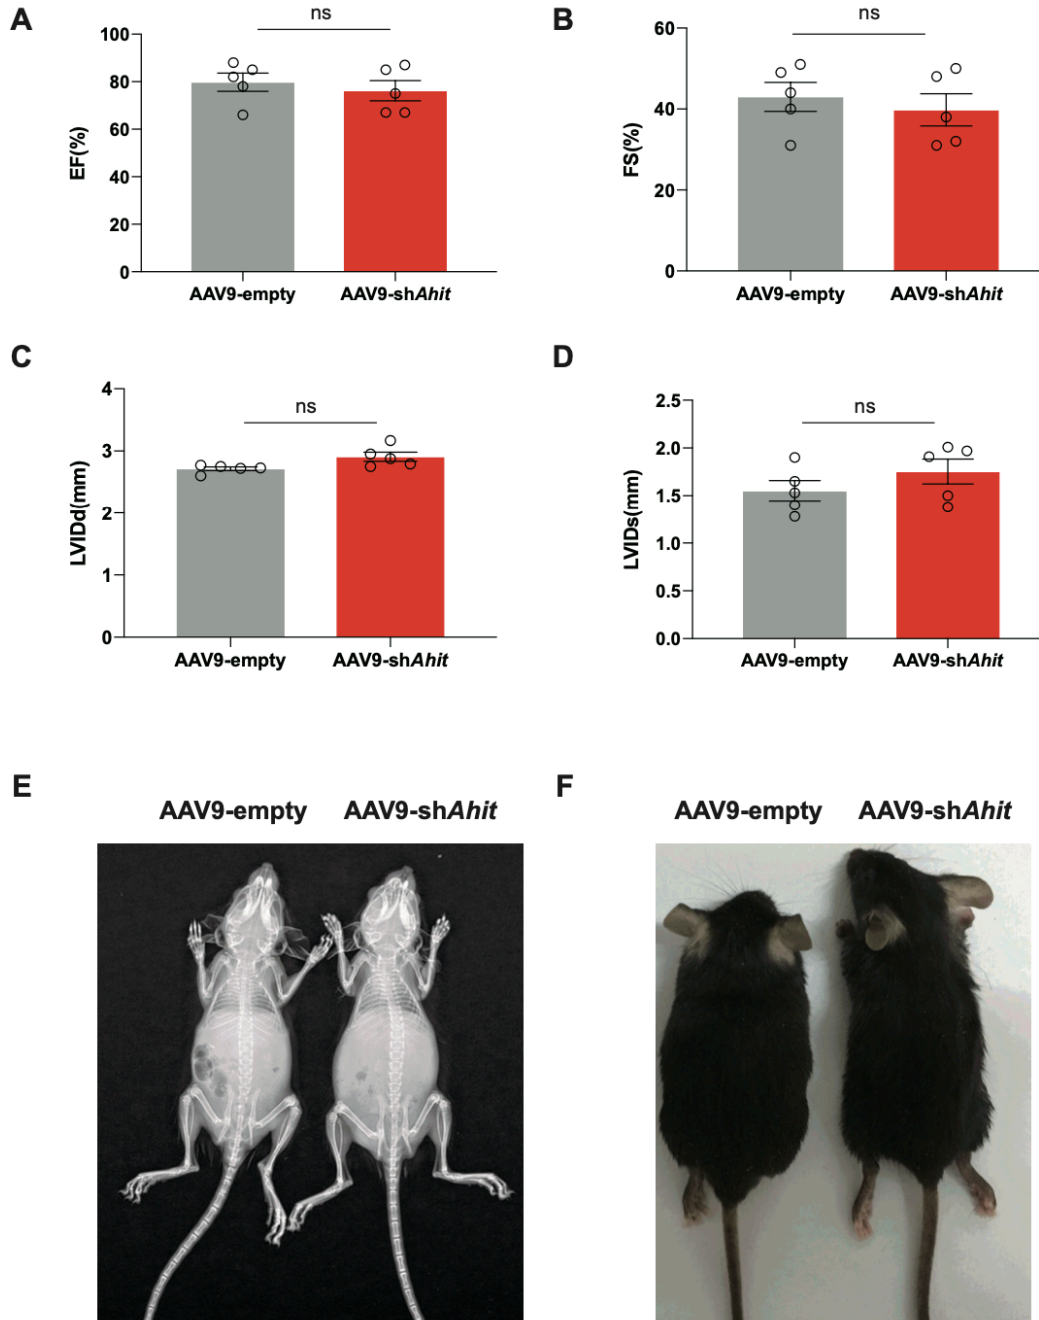

**Supplementary Figure 5. Basic cardiac function and growth of mice injected with AAV9-empty and shAhit.** **A-D.** Echocardiography analyses of cardiac function between the two groups. EF: Left ventricular ejection fraction; FS: Fractional shortening; LVIDd: Left ventricular internal dimension at end-diastole; LVIDs: Left ventricular internal dimension at end-systolic pressure ( $n=5$ /group). **E and F.** X-ray (**E**) and gross appearance (**F**) of the two groups of mice.

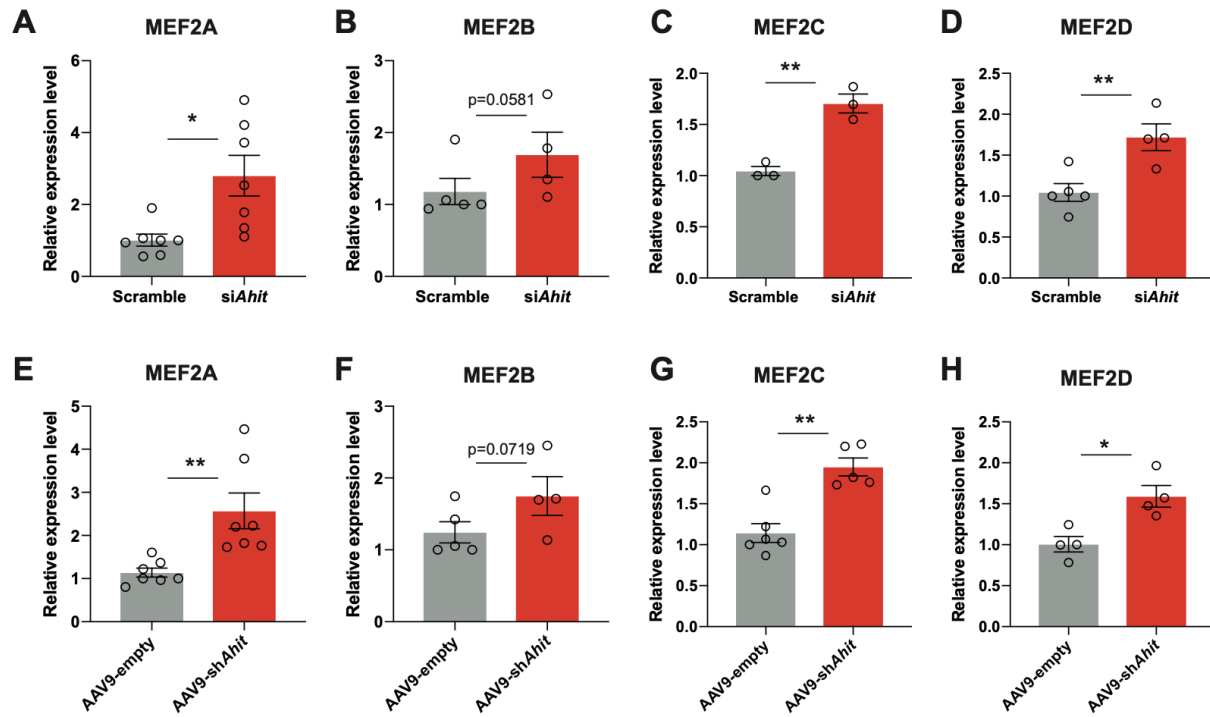

**Supplementary Figure 6. The expressions of the MEF2 family genes, MEF2A, MEF2B, MEF2C, and MEF2D, after *Ahit* knock-down *in vitro* and *in vivo*.** A-D, qRT-PCR analysis of MEF2A (A), MEF2B (B), MEF2C (C), and MEF2D (D) expressions in the NMCMs transfected with *Ahit* or scramble siRNA ( $n=3$ ,  $*P < 0.05$ ;  $**P < 0.01$  versus scramble, Student's t-test). E-H, Cardiac *in vivo* expression of MEF2A (E), MEF2B (F), MEF2C (G), and MEF2D (H) in AAV9-shAhit infected mice detected by qRT-PCR ( $n=5$ ,  $*P < 0.05$ ;  $**P < 0.01$  versus AAV9-empty, Student's t-test). All data are shown as the mean $\pm$ SEM.

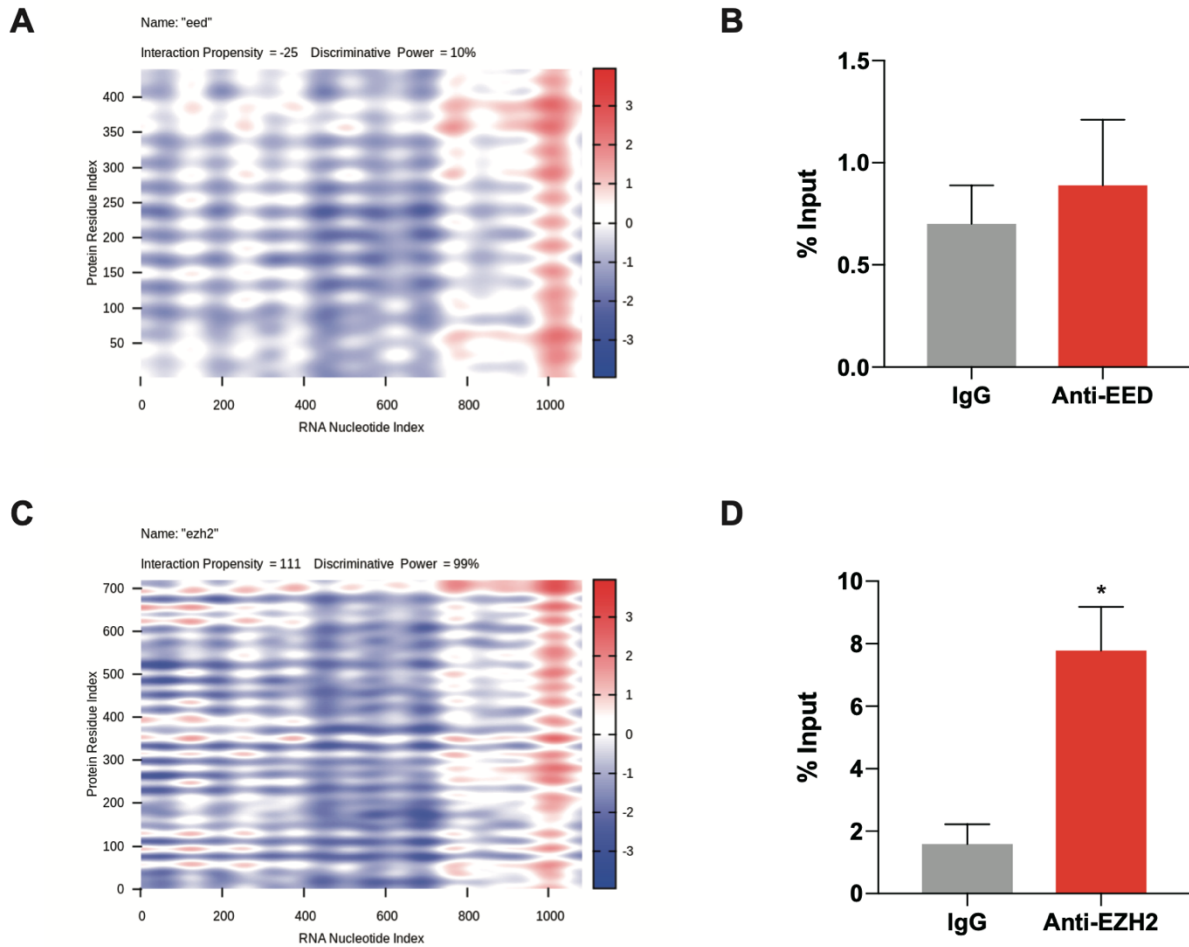

**Supplementary Figure 7.** Interaction between *Ahit* and other PRC2 components. **A and C.** Online prediction between *Ahit* and EED (**A**), *Ahit* and EZH2 (**C**) on catRAPID website. **B and D.** RNA immunoprecipitation (RIP) of EED and *Ahit* (**B**), EZH2 and *Ahit* (**D**) in NMCMs. Bars represent fold-enrichment of *Ahit* immunoprecipitated by specific EED or EZH2 antibody or anti-IgG ( $n=4$ .  $*P < 0.05$  versus IgG, Student's t-test). Data are shown as mean $\pm$ SEM.





**Supplementary Table 1. Patients' conditions****Control patients**

| <b>Gender</b> | <b>Age</b> | <b>Blood pressure (mmHg)</b> | <b>cardiac hypertrophy</b> |
|---------------|------------|------------------------------|----------------------------|
| Female        | 72         | 115/87                       | -                          |
| Female        | 72         | 114/76                       | -                          |
| Female        | 74         | 112/73                       | -                          |
| Female        | 65         | 128/86                       | -                          |
| Female        | 76         | 107/60                       | -                          |
| Female        | 64         | 110/67                       | -                          |
| Female        | 75         | 110/64                       | -                          |
| Male          | 71         | 139/84                       | -                          |
| Male          | 64         | 145/80                       | -                          |
| Male          | 75         | 128/80                       | -                          |
| Male          | 70         | 125/80                       | -                          |
| Male          | 18         | 109/63                       | -                          |
| Male          | 25         | 101/60                       | -                          |
| Male          | 69         | 125/88                       | -                          |
| Male          | 64         | 115/75                       | -                          |

**Hypertensive heart disease patients**

| <b>Gender</b> | <b>Age</b> | <b>Blood pressure (mmHg)</b> | <b>cardiac hypertrophy</b> |
|---------------|------------|------------------------------|----------------------------|
| Female        | 72         | 190/110                      | +                          |
| Female        | 73         | 170/100                      | +                          |
| Female        | 78         | 180/95                       | +                          |
| Female        | 91         | 190/110                      | +                          |
| Female        | 74         | 180/100                      | +                          |
| Female        | 82         | 215/90                       | +                          |
| Male          | 74         | 185/115                      | +                          |
| Male          | 84         | 126/88                       | +                          |
| Male          | 69         | 126/76                       | +                          |
| Male          | 68         | 175/105                      | +                          |
| Male          | 68         | 105/65                       | +                          |

## Supplementary Table 2. Primers list

| Gene          | Species           | Forward Primer          | Reverse Primer           |
|---------------|-------------------|-------------------------|--------------------------|
| <b>ANP</b>    | Rattus norvegicus | TGAGCCGAGACAGCAAACAT    | CAATATGGCCTGGGAGCCAA     |
| <b>BNP</b>    | Rattus norvegicus | CAGAAGCTGCTGGAGCTGATA   | GGCGTGTCTTGAGACCTAA      |
| <b>β-MHC</b>  | Rattus norvegicus | CCGAGTCCCAGGTCAACAAG    | CTGGAGCTGGGTAGCACAA      |
| <b>GAPDH</b>  | Rattus norvegicus | GCCCAGCAAGGATACTGAGA    | GATGGTATTTCGAGAGAAGGGAGG |
| <b>Ahū</b>    | Rattus norvegicus | CGGAATGGGTCTGGAATGGT    | TGGAACAAGCGGACGTAACA     |
| <b>MEF2A</b>  | Mus musculus      | GAAAGCAGGACGAACCTCGGA   | AGTATCAGGGTCTGGGCTGT     |
| <b>Neat1</b>  | Mus musculus      | ACCTTTTTTCATGGGGGTAG    | GCTGGATGGAGGCTTGTTA      |
| <b>18S</b>    | Mus musculus      | CGCGGTTCATTTTGTGGT      | AGTCGGCATCGTTTATGGTC     |
| <b>snoRNA</b> | Mus musculus      | CAGAGTAGCGAGGACTTGAAGAG | GCTGGTTCGTCTATCTTGTGGG   |
| <b>Ahū-V</b>  | Mus musculus      | ACGGTGCCTTACTGACACAC    | ATTGCTCTGGCTGTAGGGTG     |
| <b>Ahū</b>    | Mus musculus      | ACCCAAGGAAAACCTGTTGA    | GAACCTAACGGGGAAGTGCGA    |
| <b>GAPDH</b>  | Mus musculus      | CCACTCTCCACCTTCGATG     | CCACCACCTGTTGTGT A       |
| <b>Ahū-P1</b> | Mus musculus      | AGGCAAGCATGAACCTGTCA    | AGGGACCCTAATGACCTCCC     |
| <b>Ahū-P2</b> | Mus musculus      | TGTCGGCTTCTCTTGGAGC     | ATGGCTCCTAGGTGGTCAGT     |
| <b>Ahū-P3</b> | Mus musculus      | AAGTGTGGGAGGCCACTATG    | TCCAGTGACTCCTCCAGGTA     |
| <b>Ahū-P4</b> | Mus musculus      | GCTTGGGGAACCAGCATTG     | TGAAGCGACCCACTTTCCTC     |
| <b>Ahū-P5</b> | Mus musculus      | GGGCTCTTCTCCCATTC       | CTGGTAAACAACCCGCAGGA     |

## Supplementary Table 3. The top 20 up-regulated ncRNAs

| Probe Set ID | lncRNA             | P-value   | FDR      | Fold-change | style | TAC 2W1  | TAC 2W2  | TAC 2W3  | sham 1   | sham 2   | sham 3   |
|--------------|--------------------|-----------|----------|-------------|-------|----------|----------|----------|----------|----------|----------|
| 17432861     | <b>Gm13054-00</b>  | 0.0000508 | 0.00097  | 2.34        | up    | 7.19917  | 6.773957 | 6.816598 | 5.560976 | 5.877608 | 5.664166 |
| 17492031     | <b>4833412C05</b>  | 0.0005493 | 0.00299  | 2.24        | up    | 4.328189 | 5.020806 | 4.439967 | 3.646907 | 3.165509 | 3.179484 |
| 17284354     | <b>Ighv1-47-20</b> | 0.0074278 | 0.0161   | 2.15        | up    | 5.825106 | 5.24115  | 6.155831 | 4.950842 | 4.104911 | 4.854156 |
| 17284356     | <b>Ighv1-54-20</b> | 0.0012106 | 0.0046   | 2.13        | up    | 5.61173  | 5.252519 | 6.013564 | 4.68402  | 4.254404 | 4.658948 |
| 17497783     | <b>Gm22019-20</b>  | 0.0030595 | 0.00839  | 2.12        | up    | 5.383635 | 5.495275 | 4.878191 | 4.079642 | 4.626595 | 3.794038 |
| 17249829     | <b>LOC100862</b>   | 0.0013807 | 0.00496  | 2.05        | up    | 7.419577 | 6.675532 | 6.859843 | 6.122295 | 5.994383 | 5.731214 |
| 17225169     | <b>Snora75</b>     | 0.0194548 | 0.0343   | 1.98        | up    | 4.306142 | 5.289876 | 4.224824 | 3.273994 | 4.100536 | 3.433555 |
| 17458677     | <b>Gm20297</b>     | 0.0011527 | 0.00452  | 1.95        | up    | 4.099085 | 4.731099 | 4.024061 | 2.514409 | 2.701237 | 2.66096  |
| 17278757     | <b>Gm24564-20</b>  | 0.0025984 | 0.00747  | 1.93        | up    | 4.576254 | 4.576254 | 4.859112 | 3.26167  | 4.157985 | 3.678313 |
| 17288107     | <b>Mir27b</b>      | 0.0005297 | 0.0029   | 1.89        | up    | 4.773398 | 4.971069 | 4.728637 | 3.580769 | 4.112498 | 4.034415 |
| 17260931     | <b>Mir1933</b>     | 0.0060548 | 0.0138   | 1.83        | up    | 4.354985 | 4.603126 | 3.663538 | 3.297647 | 3.308748 | 3.368515 |
| 17284314     | <b>Ighv7-3-201</b> | 0.0050719 | 0.012    | 1.79        | up    | 4.4392   | 4.598856 | 4.835496 | 4.090337 | 3.048213 | 3.937337 |
| 17288105     | <b>Mir23b</b>      | 0.0439697 | 0.0652   | 1.79        | up    | 4.857151 | 5.34798  | 4.711966 | 3.345747 | 4.49321  | 4.564165 |
| 17491596     | <b>Snord116</b>    | 0.030266  | 0.0483   | 1.77        | up    | 4.022402 | 5.039968 | 5.034625 | 3.954946 | 4.161333 | 3.51315  |
| 17457804     | <b>LOC665506</b>   | 0.0369548 | 0.0572   | 1.75        | up    | 6.074794 | 6.293189 | 6.069461 | 6.027606 | 4.650615 | 5.32629  |
| 17459415     | <b>Igk-V28</b>     | 0.0000082 | 0.000615 | 1.72        | up    | 7.3159   | 7.30661  | 7.331053 | 6.449608 | 6.556776 | 6.597958 |
| 17264180     | <b>Gm12295</b>     | 0.0400718 | 0.0609   | 1.71        | up    | 4.7357   | 6.052444 | 5.649583 | 4.695332 | 4.6282   | 4.799949 |
| 17491537     | <b>Gm26504</b>     | 0.0416898 | 0.0624   | 1.7         | up    | 4.03064  | 5.026043 | 5.102505 | 4.012105 | 4.249637 | 3.607674 |
| 17344140     | <b>D17H6S56E</b>   | 0.0011994 | 0.00458  | 1.7         | up    | 5.237349 | 4.858284 | 5.400797 | 4.297372 | 4.523228 | 4.382611 |
| 17464530     | <b>Gm20559</b>     | 0.0132643 | 0.0253   | 1.7         | up    | 7.034883 | 7.417033 | 7.005577 | 6.900485 | 6.046176 | 6.220438 |
